# Supplementary figures and images for: Yeast Functional Genomic Screens Lead to Identification of a Role for a Bacterial Effector in Innate Immunity Regulation
Source: PLOS journal article supplement (doi:10.1371/journal.ppat.0030021), 2007-02-13

**A**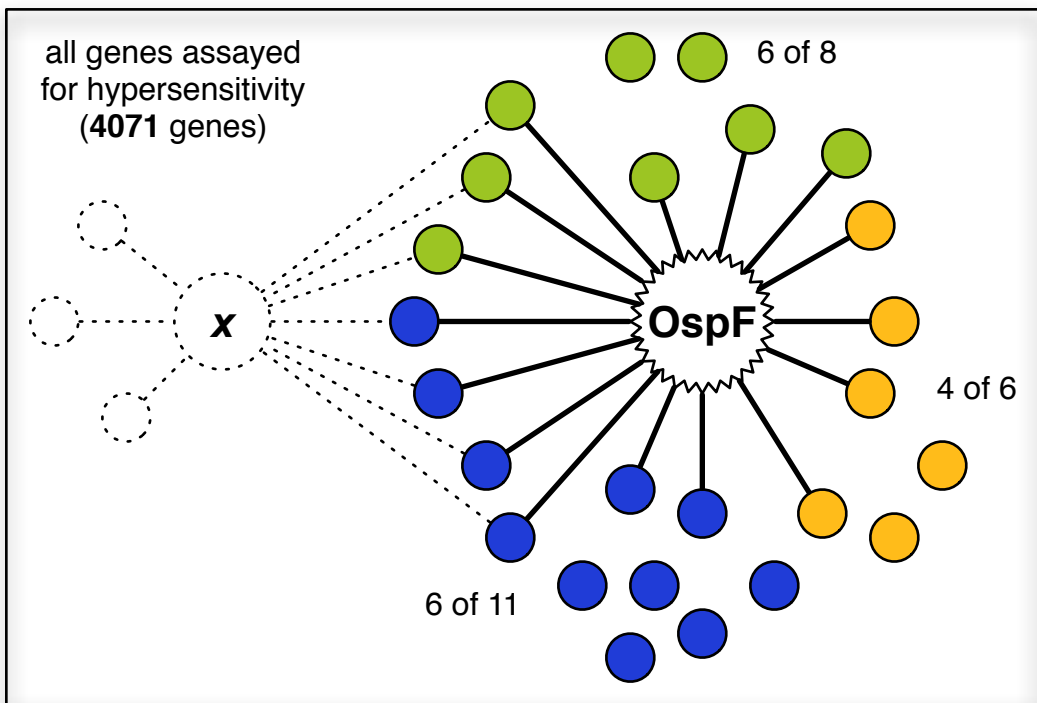**B**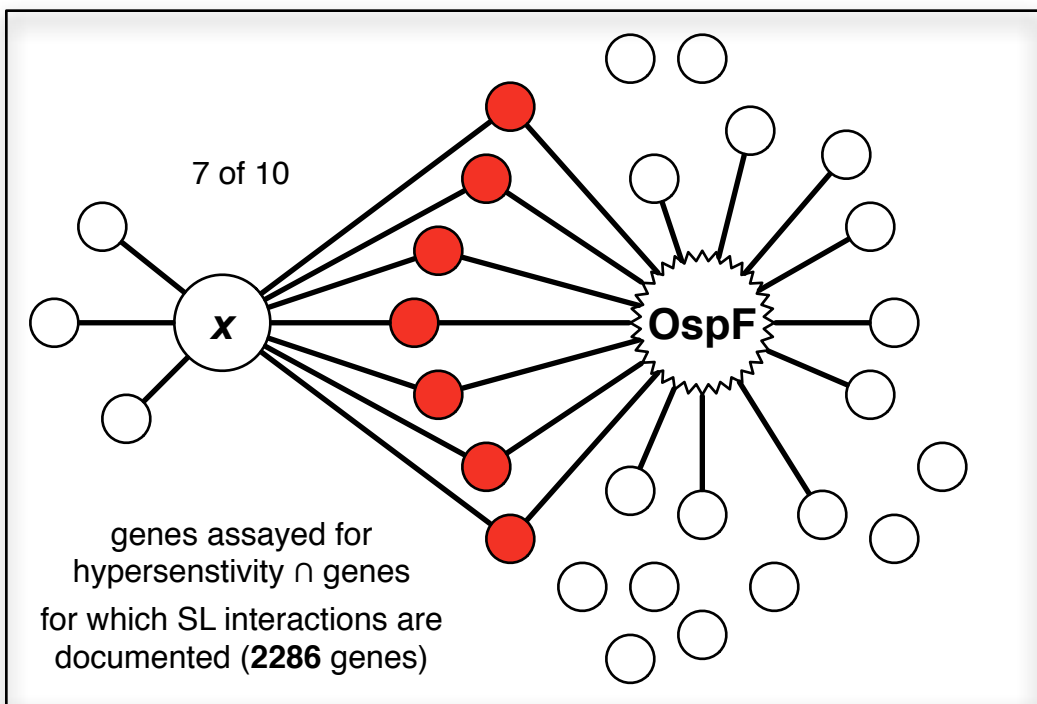

Supplement: S4 (10.1371/journal.ppat.0030021.s004) [file journal.ppat.0030021.s004]
